# Supplementary material for: Associations among oxytocin receptor gene (OXTR) DNA methylation in adulthood, exposure to early life adversity, and childhood trajectories of anxiousness
Source: PubMed Central journal article supplement (PMC5547144; doi:10.1038/s41598-017-07950-x), 2017-08-07
Supplement: 41598_2017_7950_MOESM1_ESM.pdf [file 41598_2017_7950_MOESM1_ESM.pdf]

Associations among oxytocin receptor gene (*OXTR*) DNA methylation in adulthood, exposure to early life adversity, and childhood trajectories of anxiousness.

J.P. Gouin<sup>\*1</sup>, Q.Q.Zhou<sup>1</sup>, L. Booij<sup>1,2\*</sup>, M. Boivin<sup>3,4</sup>, S.M. Côté<sup>5,6,7</sup>, M. Hébert<sup>8</sup>, I. Ouellet-Morin<sup>9</sup>, M. Szyf<sup>1,2\*</sup>, R.E. Tremblay<sup>6\*</sup>, G. Turecki<sup>11</sup>, and F. Vitaro<sup>6,12</sup> (\*Senior authors).

| PCR Primers             |                   |                                           |
|-------------------------|-------------------|-------------------------------------------|
| Promoter                | OXTR_Promo_F1     | GTTGGTTTTAGAGTTTTAATAAATGGG               |
|                         | OXTR_Promo_R1     | /5Biosg/ATTTTTAAATCCTAACCTTTTTTCTAAC<br>T |
|                         | OXTR_Promo_8CG_F2 | ATGGGTTTATTTTGTAGTGGTTTAA                 |
|                         | OXTR_Promo_8CG_R2 | /5Biosg/AATAACCCCTCTCCCAACACTACTTAAA<br>A |
|                         | OXTR_Promo_7CG_F3 | ATTAGAAATGGTTTTTATTTTAAGTAGTGT            |
|                         | OXTR_Promo_7CG_R3 | Same as OXT_Promo_R1                      |
| Intron                  | OXTR_Intron_F1    | GAGAGATTTTAGTTTTAGTATTATATTAG             |
|                         | OXTR_Intron_R1    | CCCTAAACTTCCACAACACCTAC                   |
|                         | OXTR_Intron_F2    | GTAGTTGGGTGTTAAGTAGGTAG                   |
|                         | OXTR_Intron_R2    | /5Biosg/CAAACCCTAACATAAACACCTCC           |
| Enhancer 1              | OXTR_Enh1_F1      | GTTTTGAGTTTTTGGTGATTTTTTTT                |
|                         | OXTR_Enh1_R1      | TTCCCTACCCCTTAAACTTCAACA                  |
|                         | OXTR_Enh1_F2      | GGTTTTTGTTTTTTAGTTTTTTTATTTGT             |
|                         | OXTR_Enh1_R2      | /5Biosg/CACTCTAACCAAATCTATATATATC         |
| Pyro Sequencing Primers |                   |                                           |
| Promoter                | Promo_SQ1         | GTAGTGGTTTAAAATT                          |
|                         | Promo_SQ1_2       | GAGAGGGAGGGAATT                           |
|                         | Promo_SQ2         | GGTTTAGAAGTTTTTG                          |
|                         | Promo_SQ2_2       | AGAAGTTTTTGATT                            |
|                         | Promo_SQ3         | ATTTTATAGTTTGATGTAG                       |
|                         | Promo_SQ4         | GGAATATTTTTGTTTTTATT                      |
|                         | Promo_SQ5         | GTAGTGTGGGAGAG                            |
|                         | Promo_SQ6         | AGTGATTTTGTGTTT                           |
| Promo_SQ6_2             | GTTTAAGAGT        |                                           |
| Intron                  | Intron_SQ1        | TTAAGTAGGGGTGGA                           |
|                         | Intron_SQ2        | GGTGGTGGGGTGTTT                           |
|                         | Intron_SQ3        | TTGTAAAGTGATTTT                           |
|                         | Intron_SQ4        | TATTTGGGTTTAAAG                           |
| Enhancer 1              | Enh1_SQ1          | GAGTGTGTGGTTAAT                           |
|                         | Enh1_SQ2          | TTATATTTTAAAAGTA                          |

**Supplementary Table S1.** *OXTR* Targeted Regions Primers List.

| CpG Reference | Genomic Position |
|---------------|------------------|
| I1            | chr3:8810832     |
| I2            | chr3:8810807     |
| I3            | chr3:8810797     |
| I4            | chr3:8810774     |
| I5            | chr3:8810733     |
| I6            | chr3:8810708     |
| P1            | chr3:8811332     |
| P2            | chr3:8811348     |
| P3            | chr3:8811359     |
| P4            | chr3:8811363     |
| P7            | chr3:8811543     |
| P8            | chr3:8811601     |
| E1            | chr3:8806906     |
| E2            | chr3:8806899     |
| E3            | chr3:8806894     |
| E4            | chr3:8806887     |

**Supplementary Table S2.** Genomic coordinates for investigated CpG sites. Contains reference to exact human hg19 CpG genomic coordinates. I, P, E denote Intron 1, Promoter, Enhancer 1, respectively.

|                            |                                                        |                                                                                                                                                                                                                                                                                                                                                                                                                                                                                                                                                                                                                                                                                                                                                                                                                                                                         |
|----------------------------|--------------------------------------------------------|-------------------------------------------------------------------------------------------------------------------------------------------------------------------------------------------------------------------------------------------------------------------------------------------------------------------------------------------------------------------------------------------------------------------------------------------------------------------------------------------------------------------------------------------------------------------------------------------------------------------------------------------------------------------------------------------------------------------------------------------------------------------------------------------------------------------------------------------------------------------------|
| Plasmid Primers            | Promo_S_F1<br>Promo_S_R1<br>Promo_AS_F1<br>Promo_AS_R1 | TCACGGATCCAAATGGGTTTATTT<br>GTGAAAGCTTCTCAAGTCTCTCCAC<br>TCACGGATCCTCAAGTCTCTC<br>GTGAAAGCTTTTTGCAGTGGTTAA                                                                                                                                                                                                                                                                                                                                                                                                                                                                                                                                                                                                                                                                                                                                                              |
| Plasmid Sequencing Primers | Promo_SQ_F<br><br>Promoter construct sequence          | GGGTTTATTTTGCAGTGGTTTAAAC<br><br>AAATGGGTTTATTTTGCTCAAGTCTCTCCACAAA<br>TGGGTTTATTTTGCAGTGGTTTAAACTGCGAG<br>AGGGAGGGAACCTCGTCAATAACCCGCCCGTTTC<br>TTCTTTCTTGGTTTAGAAGCTCTTGACTCCAGA<br>CACATAGGAGGCTTGAATAATAATGTTCTTCCC<br>CGGGTAGATAGTGATGAAGTTACAAAAGCATTT<br>AACTGATTATTTCCCAAAAATGATGTTAATTTT<br>CAGGCTTTTCTCTCCCCCACACCTCCAGCTTGA<br>TGTAGCGGCTTTAGCAGTGAACCTCAAATAAGTC<br>TTTGCTTTGGAATACTTTTGTTCCTATTCCCGTT<br>AATGAGGAATTAGAAATGGCCTCTATTCTAAGC<br>AGTGCTGGGAGAGGCGTTATTTTTTCGGTAGTTT<br>TAGAGGAAATTCTGAAGCACAACTGTCTTCA<br>TTAAAGTGATTCTGCTTGTCTGCGCCAAGAG<br>CCGTTTCTGCCTCCTTGTGCGCTTCGGAATTAA<br>AATTCTAAATGATGCCAAAGGAAGATAAAATGT<br>TAAAGACAGCTTCTCAGCCTCCCTGCCCTTCTC<br>TATTCTAAAATCATTTTTTGAAGTAATTTACAGT<br>GGCCAAGAATTAAGTCAGAAAAAAGGCCAGG<br>ATTCAAAAATAAACAGGGCTCTTTAAAATGCAT<br>TAAATGTGTATTTCTCCTGACATTTCACTTCTC<br>CGTCTTTTTATTATGTGGAGAGACTTGA G |

**Supplementary Table S3.** Plasmid Primers List
